# Supplementary material
Source: publisher figshare collection journal article supplement (https://gsapubs.figshare.com/ndownloader/files/23318294)
Supplement: Supplementary file 1 [file 23318294]

## Sheet: Sheet1
	b axis (D)	Pivot angle (φ)	Bearing angle (β)	Protrusion (P)	Exposed area (Aprop)	Matrix fraction (fM)	Critical shear stress (τc)	Dimensionless critical shear stress (τ*c)
	mm	degrees	degrees	mm	-	-	Pa			X-ray computed tomography reveals that grain protrusion controls critical entrainment shear stress in fluvial gravels
	30.321	36.535	4.2892	22.196	0.82835	0	37.04	0.07547		Rebecca A. Hodge, Hal Voepel, Julian Leyland, David A. Sear, Sharif Ahmed
	63.357	90.289	64.44	19.797	0.34909	0.0023376	207.45	0.20228
	29.377	41.429	56.31	17.997	0.87023	0.0013335	38.704	0.081393		Geometric properties and critical shear stress for 1092 water-worked grains.
	57.014	31.916	50.711	18.597	0.24886	0.00025824	115.05	0.12466		Grain geometry was measured using X-ray computed tomography, and critical shear stress was calculated using a new grain entrainment model.
	53.531	125.82	2.3533	14.998	0.21813	0.003797	181.08	0.20899		Grains with values of NaN/Inf were excluded from the relevant analysis.
	24.303	55.757	43.531	13.198	0.56131	0.0036881	58.716	0.14926		D50 = 23 mm
	68.215	146.81	8.3659	14.998	0.12033	0.0024658	262.3	0.23756
	46.943	81.871	9.5931	10.198	0.25643	0.0021025	333.96	0.43951
	32.113	76.629	56.31	7.7987	0.32945	0.0018695	315.03	0.60607
	26.187	112.57	1.8476	7.7987	0.20831	0.0073209	319.85	0.7546
	16.313	50.214	32.735	13.198	0.66924	0	73.117	0.2769
	25.622	98.385	74.219	9.5984	0.37749	0.00043545	206.36	0.49757
	17.565	91.528	79.216	2.9995	0.19273	0.0040032	852.37	2.998
	36.813	135.55	10.305	8.9985	0.26527	0.00030102	387.98	0.6511
	7.0849	62.848	6.3402	5.999	0.71172	0	54.834	0.47815
	15.381	57.442	4.9697	9.5984	0.47936	0	16.211	0.065112
	22.189	90.413	43.152	2.3996	0.11111	0.00090171	1027.6	2.8613
	6.3624	62.639	15.945	5.3991	0.59854	0	97.266	0.94446
	34.707	168.42	14.5	6.5989	0.14792	0.0069097	627.39	1.1168
	31.799	67.833	75.379	6.5989	0.23516	0.0026025	436.04	0.84714
	17.481	119.95	28.61	6.5989	0.20699	0.00030694	266.53	0.94192
	17.917	71.163	75.466	7.1988	0.2726	0.0003296	228.3	0.78717
	26.476	0.087035	5.1944	8.9985	0.59191	0	0.43945	0.0010254
	34.743	179.25	88.727	2.3996	0.045057	0.0012307	2278.1	4.051
	11.214	114.14	60.255	1.1998	0.085616	0.0019512	3843.8	21.176
	23.329	149.32	36.027	8.9985	0.33701	0.0030469	64.319	0.17033
	27.353	121.09	20.41	2.9995	0.13757	0.0044776	1004.9	2.2696
	34.267	15.225	29.445	10.798	0.28264	0.0031423	167.2	0.30145
	30.133	52.755	40.101	7.1988	0.19989	0.00047363	348.24	0.71399
	11.039	21.925	8.7462	2.9995	0.41178	0	107.81	0.60338
	17.361	54.644	39.472	7.1988	0.33758	0.0011115	157.46	0.56034
	29.126	168.62	0	2.9995	0.039026	0.0014712	495.12	1.0502
	28.693	124.29	62.784	7.7987	0.15435	0.0047592	328.72	0.70778
	8.4059	63.037	26.565	5.3991	0.64466	0	99.756	0.73317
	20.145	122.83	22.834	2.9995	0.060426	0.0022762	1347.7	4.1328
	5.9738	146.6	36.87	0.5999	0.10185	0	2350	24.303
	18.192	172.92	8.1301	2.9995	0.14831	0.00818	290.63	0.98694
	12.673	50.555	20.556	2.3996	0.23047	0.0011351	406.25	1.9805
	17.901	64.626	82.405	11.398	0.33635	0.00083287	939.58	3.2426
	26.34	83.75	15.255	3.5994	0.32921	0.0035868	562.35	1.319
	12.467	91.512	53.973	2.9995	0.51515	0	483.79	2.3974
	26.835	0.79108	81.724	4.7992	0.1278	0.00071053	312.7	0.71989
	32.825	33.355	90	1.1998	0.015597	0.00077442	10187	19.173
	25.363	51.557	60.945	3.5994	0.099387	0	1029.7	2.5081
	13.937	17.086	22.834	3.5994	0.28224	0.005299	127.83	0.56664
	31.248	32.349	71.565	1.1998	0.037945	0.0013945	2844.1	5.6231
	28.527	41.686	86.055	2.9995	0.079149	0.0037092	1616.1	3.4999
	29.865	78.378	81.027	5.3991	0.32541	0.00020218	425.35	0.8799
	9.8709	98.352	67.38	3.5994	0.44271	0.0013908	378.91	2.3715
	52.96	49.353	79.019	18.597	0.60496	0.00012804	190.38	0.22209
	28.114	71.771	15.255	22.196	0.82791	0.00078715	41.129	0.09038
	40.381	30.281	67.166	22.196	0.72089	0	77.049	0.11788
	35.266	72.857	8.1301	14.998	0.46131	0	76.048	0.13322
	24.749	54.174	36.158	13.198	0.49425	0.00070016	95.618	0.23869
	23.336	2.0053	56.976	10.198	0.52555	0.0026987	18.103	0.047926
	40.496	145.43	47.045	4.7992	0.1792	0.0020545	698.72	1.066
	19.95	21.871	51.34	10.798	0.75966	0	43.378	0.13433
	28.447	33.185	22.834	17.997	0.61721	0	40.505	0.087968
	26.285	5.1244	11.041	17.397	0.76048	0.0047728	6.2775	0.014755
	60.293	107.36	71.147	16.197	0.2964	0.0032141	196.98	0.20184
	17.715	49.585	37.875	8.3986	0.61581	0.0036928	102.92	0.35893
	39.063	2.7742	1.9415	10.198	0.37019	9.6918e-05	33.157	0.05244
	16.888	5.8362	82.235	10.798	0.83986	0.0012495	51.709	0.18916
	25.725	109.99	5.856	5.3991	0.17773	0.00096548	361.1	0.86721
	36.833	24.947	90	13.798	0.43	0.00054783	474.27	0.7955
	26.914	72.107	35.362	5.3991	0.21975	0.0051454	481.26	1.1047
	30.834	28.763	54.782	16.197	0.44046	0.005696	73.973	0.14821
	32.966	18.515	88.958	10.198	0.58993	0.0048525	231.35	0.43355
	22.019	31.538	31.329	15.597	0.90152	0	20.728	0.058157
	18.531	3.6759	48.991	14.998	0.66719	0.00040816	10.468	0.034898
	30.395	153.83	55.954	2.3996	0.031711	0.0068636	2307	4.6892
	9.3134	9.5964	19.654	2.3996	0.34783	0	163.28	1.0831
	20.714	131.07	53.616	8.9985	0.72702	0.0058034	227.56	0.67872
	18.324	168.39	37.569	1.1998	0.12111	0.0078681	5593.8	18.86
	29.15	134.36	14.744	6.5989	0.19006	0.0072072	568.07	1.204
	8.6327	93.002	26.565	1.7997	0.27429	0	1395.3	9.9855
	27.834	110.17	62.021	5.999	0.13437	0.0078059	576.84	1.2803
	22.532	116.31	90	0.5999	0.025	0.0016356	7512.9	20.6
	14.828	82.516	90	4.7992	0.19429	0.0052002	566.65	2.3609
	30.792	70.19	66.501	9.5984	0.33235	0.0020478	561.94	1.1274
	17.624	87.196	85.601	8.9985	0.41474	0.011242	105.57	0.37006
	11.41	100	57.265	6.5989	0.33327	0.015968	233.89	1.2664
	9.7849	75.832	47.726	5.3991	0.47718	0.004008	195.26	1.2329
	17.262	78.732	51.843	4.7992	0.22463	0.049569	559.11	2.0011
	30.127	178.57	43.363	1.7997	0.033639	0.022989	4306.3	8.8307
	16.432	36.172	2.6026	2.3996	0.093717	0.0055908	909.62	3.4199
	18.186	88.678	86.82	0.5999	0.052126	0.0098417	7420.7	25.208
	11.614	140.52	47.291	4.1993	0.26108	0.0019802	416.21	2.2139
	20.001	44.934	90	4.7992	0.19228	0.0098542	772.61	2.3865
	16.711	59.288	27.897	2.9995	0.11169	0	714.7	2.6423
	11.621	60.456	34.992	3.5994	0.10854	0.00090909	1143.2	6.0774
	20.287	31.382	19.654	0.5999	0.028846	0.0031124	5373	16.362
	21.93	167.46	2.6026	1.1998	0.044944	0.034749	7246.9	20.415
	29.699	122.06	26.565	0.5999	0.013676	0.0086379	10165	21.144
	20.388	34.908	27.646	6.5989	0.44462	0.00036023	144.26	0.43715
	17.451	10.44	0	10.798	0.58575	0	19.824	0.070182
	8.027	23.007	7.125	4.1993	0.35765	0.01145	145.31	1.1184
	9.5671	119.14	32.005	1.1998	0.093496	0	1850	11.946
	8.9692	19.221	5.7106	1.7997	0.26036	0.0030075	426.56	2.9382
	18.234	63.659	35.538	3.5994	0.21109	0.0055205	771.48	2.6139
	15.043	41.892	38.66	5.999	0.23666	0.0061941	171.97	0.70626
	8.6602	95.401	75.964	1.1998	0.23684	0	1135.9	8.1035
	7.5937	111.81	29.055	0.5999	0.13274	0	2378.1	19.348
	12.226	123.32	11.31	0.5999	0.040541	0.0088203	6975	35.247
	8.9898	80.043	30.964	1.7997	0.26174	0.0018797	521.88	3.5864
	21.478	95.9	34.695	1.7997	0.079153	0.0016129	2660.4	7.6525
	32.372	61.95	21.801	14.998	0.70162	0.0018315	100.63	0.19206
	37.365	67.962	28.926	17.397	0.62157	0.0010757	154.45	0.25537
	32.433	67.588	34.992	13.798	0.41868	0.0017918	122.57	0.23348
	38.181	58.309	3.2705	16.197	0.6673	0.0062299	106.72	0.17268
	15.727	38.565	0	13.198	0.88496	0	11.316	0.044451
	20.809	51.837	46.548	13.798	0.73402	0	59.546	0.17678
	70.284	168.24	1.8882	16.797	0.19899	0.012422	89.417	0.078598
	24.891	47.295	2.2906	13.198	0.58934	0	69.234	0.17184
	43.58	87.686	35.166	7.7987	0.3212	0.0027174	272.56	0.38639
	61.609	85.881	29.638	14.398	0.23231	0.0072909	378.83	0.37988
	26.035	26.255	63.435	10.198	0.51566	0.0021371	142.61	0.33839
	19.401	41.45	55.491	14.398	0.70704	0.0050394	58.853	0.18741
	20.72	85.96	25.346	8.3986	0.42211	0.0059316	178.28	0.53158
	22.978	90.843	41.987	8.3986	0.41042	0.00051086	171.48	0.46107
	30.652	53.304	47.291	14.398	0.56406	0	129.53	0.26107
	23.818	58.921	73.61	1.7997	0.076142	0.0049598	2702.9	7.0109
	11.651	27.714	48.814	7.7987	0.66006	0	61.475	0.32598
	30.763	92.211	12.995	2.3996	0.055092	0.0031672	2025.9	4.0684
	45.852	4.6055	21.194	10.198	0.27067	0	63.597	0.085688
	10.344	21.666	63.435	2.9995	0.41964	0	225.2	1.3449
	18.188	139.65	15.255	2.3996	0.13958	0.0030105	849.8	2.8866
	12.883	112.64	45	1.7997	0.08206	0.011177	2336.7	11.205
	55.33	8.4851	90	7.1988	0.10951	0.010719	1516	1.6927
	20.59	70.661	2.7263	5.3991	0.32503	0.023461	304.5	0.91367
	7.7144	20.764	84.289	0.5999	0.088235	0.0018868	3406.3	27.279
	22.823	130.86	33.232	8.9985	0.28922	0.0015757	266.92	0.72253
	14.61	29.062	13.392	7.7987	0.49841	0	43.506	0.18397
	30.677	81.569	90	8.3986	0.56503	0	519.71	1.0466
	17.38	22.309	5.9061	4.7992	0.20952	0	327.25	1.1632
	8.5843	71.136	0	2.3996	0.38406	0.011013	447.27	3.2189
	9.3554	65.707	26.565	1.1998	0.14754	0.0047483	2539.1	16.767
	29.232	91.169	2.5448	8.9985	0.47767	0.0008221	220.4	0.4658
	23.074	12.442	43.831	4.7992	0.23054	0	203.25	0.54418
	19.359	55.643	35.838	2.3996	0.16058	0.0050901	888.28	2.8347
	38.619	170.14	35.538	0.5999	0.0057323	0.01868	48568	77.695
	20.075	87.695	45	5.999	0.3528	0	152.03	0.46784
	27.288	56.732	61.928	7.1988	0.29389	0.0025689	543.46	1.2304
	18.963	88.304	65.225	4.7992	0.53509	0.00097308	380.66	1.2402
	29.051	115.41	15.255	6.5989	0.19307	0	422.08	0.8976
	28.131	60.401	16.39	5.999	0.27578	0.00071212	348.3	0.76492
	40.97	143.99	51.843	1.7997	0.016043	0.0089595	8928.1	13.463
	20.144	48.228	7.125	7.1988	0.47494	0.003833	179.27	0.54981
	31.014	104.11	50.477	4.7992	0.18545	0	701.39	1.3972
	18.025	15.688	46.848	0.5999	0.068085	0	3507.8	12.023
	14.514	84.773	63.435	0.5999	0.041451	0.0062035	6001.6	25.546
	10.203	56.784	38.66	4.1993	0.4898	0.0092838	215.63	1.3057
	18.659	109.83	3.8141	1.1998	0.064302	0.0097137	3153	10.44
	13.203	78.543	51.843	1.1998	0.13043	0.0016502	2635.9	12.334
	41.686	11.939	70.253	23.396	0.69221	0.0003311	51.937	0.076973
	57.2	29.794	84.226	18.597	0.42074	0.001097	544.99	0.58862
	58.315	74.418	49.686	12.598	0.1502	0.0047455	491.33	0.52053
	29.053	22.79	30.324	19.797	0.66256	0.005041	41.142	0.087487
	30.932	62.287	0	5.999	0.17156	0.0060284	273.79	0.54683
	43.499	90.987	88.452	6.5989	0.21895	0.00051912	811.88	1.1531
	37.147	10.166	14.534	14.398	0.38632	0	73.215	0.12177
	35.195	57.089	61.699	10.798	0.32439	0.00043415	225.71	0.39619
	24.906	103.15	36.87	1.1998	0.034423	0.0039195	3636	9.0191
	25.73	27.242	43.919	4.7992	0.13097	0.0033392	450.59	1.0819
	60.032	152.6	1.5482	10.198	0.11882	0.009117	319.37	0.32867
	33.035	19.337	27.255	12.598	0.43516	0.002001	126.68	0.23691
	28.013	73.285	26.565	10.198	0.51372	0.0022891	196.07	0.43241
	31.647	2.8511	3.3665	1.7997	0.032189	0.0079681	2388.5	4.6628
	54.811	128.14	90	8.3986	0.13776	0.0037363	914.39	1.0306
	47.331	132.27	15.186	9.5984	0.10357	0.011156	677.72	0.88461
	26.767	97.434	20.323	1.7997	0.042882	0.013483	3567.8	8.2347
	21.706	56.825	7.7652	8.3986	0.45042	0.02436	125.63	0.35757
	30.15	61.293	63.435	7.1988	0.23549	0.0082506	416.87	0.8542
	29.236	84.69	67.62	8.9985	0.35527	0.0070488	844.73	1.7851
	26.624	112.41	19.44	0.5999	0.015893	0.002369	10420	24.178
	29.028	73.488	39.56	1.1998	0.04572	0.0047948	3391.3	7.2176
	39.099	106.66	53.326	2.9995	0.074312	0.0035663	1503.7	2.376
	50.514	48.877	56.575	25.796	0.56848	0	137.35	0.16798
	64.323	57.063	55.905	13.798	0.34657	0.00033074	326.86	0.31394
	33.965	95.154	39.806	16.197	0.44899	0.00090511	82.796	0.1506
	32.264	37.971	85.333	19.797	0.80119	0	231.45	0.44319
	31.556	55.66	8.1301	19.197	0.68946	0	54.589	0.10687
	34.295	8.4993	22.109	20.997	0.70305	0.001125	9.9001	0.017834
	59.006	2.5916	42.51	8.3986	0.20892	0	138.06	0.14455
	30.564	65.989	9.8658	8.3986	0.24222	0	265.91	0.53749
	22.01	56.003	51.009	14.398	0.60436	0	78.368	0.21997
	28.586	80.364	32.735	9.5984	0.4371	0.0023897	228.29	0.49339
	30.455	64.251	67.068	10.798	0.68231	0	187.41	0.38018
	52.263	30.11	39.289	10.798	0.31251	0.0011698	185.33	0.21908
	25.261	61.277	90	10.798	0.43888	0.0015779	1410.5	3.4497
	14.972	56.58	38.157	5.3991	0.42098	0.0013089	197.92	0.81672
	25.187	97.23	3.0128	5.999	0.17819	0.0020047	327.83	0.80412
	21.318	79.114	87.274	7.7987	0.34886	0.0022756	341.58	0.98987
	29.195	110.78	12.804	7.7987	0.24719	0	325.27	0.6883
	24.471	102.22	60.068	7.7987	0.2334	0.00061275	363.98	0.91891
	46.672	106.11	5.9645	9.5984	0.24714	0.0027378	377.47	0.49966
	28.549	89.256	12.339	7.7987	0.44464	0.0012094	225.37	0.4877
	27.912	94.792	40.601	6.5989	0.21137	0.0037022	465.41	1.0301
	20.118	70.849	34.216	10.798	0.70117	0.00057257	106.85	0.32812
	31.036	108.42	31.799	7.1988	0.15947	0.0019318	399.97	0.79617
	23.527	72.686	62.447	2.9995	0.14883	0.00025927	949.68	2.4937
	23.122	50.704	30.964	7.7987	0.3464	0.0015342	153.67	0.41059
	24.974	102.25	71.565	3.5994	0.15907	0.001336	673.93	1.6672
	14.681	92.267	79.216	3.5994	0.34409	0	495.8	2.0864
	19.815	62.685	82.875	8.9985	0.52709	0	403.32	1.2575
	24.344	12.992	46.848	7.7987	0.36687	0.011898	157.24	0.39903
	29.893	31.084	30.964	3.5994	0.12523	0.00033881	495.95	1.025
	32.501	64.109	90	2.9995	0.042535	0.0020685	2950.9	5.6092
	26.426	76.06	70.866	2.9995	0.098462	0	897.51	2.0983
	19.306	56.441	35.218	1.1998	0.060241	0	2242	7.1745
	13.023	105.04	26.565	2.3996	0.14955	0	739.06	3.506
	19.867	45.697	36.87	1.7997	0.065466	0	1298.6	4.0383
	18.939	126.98	28.811	2.9995	0.12872	0.001801	945.8	3.0852
	19.057	3.4382	12.804	1.7997	0.093797	0	282.42	0.91558
	20.57	93.333	7.125	3.5994	0.18694	0.00068074	418.55	1.2571
	22.072	58.508	90	2.3996	0.084484	0.0043325	2024.9	5.6678
	11.08	83.827	32.471	0.5999	0.082707	0	4104.7	22.887
	19.479	116.77	36.87	0.5999	0.027875	0.007913	10083	31.978
	54.884	87.644	70.346	22.196	0.36877	0.00022833	196.32	0.22098
	36.812	75.163	25.201	15.597	0.41362	0.000555	139.21	0.23364
	60.31	42.089	88.781	19.797	0.49578	9.5611e-05	610.35	0.62522
	25.718	80.703	18.435	7.1988	0.39971	0	265.85	0.63863
	70.924	158.59	16.417	16.197	0.33557	0.0013579	108.85	0.094813
	65.06	150.43	53.383	12.598	0.21166	0.00052222	365.12	0.34671
	28.969	45.602	32.905	10.798	0.39052	0	137.1	0.29239
	21.53	26.904	7.7652	10.198	0.53676	0.0011876	34.808	0.099882
	24.457	79.626	33.69	6.5989	0.2186	0	436.07	1.1016
	9.3822	24.998	21.801	7.7987	0.63294	0	27.002	0.1778
	9.0186	35.448	84.289	1.7997	0.35878	0	956.25	6.5506
	18.783	43.158	87.138	8.9985	0.74722	0	223.02	0.73355
	26.054	152.09	71.565	7.7987	0.18241	0.0018684	534.35	1.2671
	30.759	58.443	9.7524	12.598	0.37058	0	123.01	0.24706
	10.082	46.068	45	8.3986	0.67677	0	56.006	0.34317
	10.222	81.601	13.392	2.3996	0.41176	0	361.52	2.1851
	11.873	58.623	79.216	5.999	0.60877	0	207.13	1.0778
	11.117	68.255	60.642	5.3991	0.68421	0.0053715	246.73	1.3712
	15.69	93.684	51.34	5.999	0.33259	0.00079808	268.8	1.0584
	13.248	63.927	21.801	7.1988	0.35632	0.0032616	118.51	0.55262
	9.7047	42.164	48.814	7.1988	0.35459	0	83.887	0.53402
	30.617	68.212	40.815	11.398	0.63778	0	143.22	0.289
	8.1023	44.895	86.424	4.1993	0.45946	0	437.11	3.3329
	9.3663	53.924	21.801	5.3991	0.70087	0	96.484	0.63641
	12.217	87.267	6.7098	5.999	0.67189	0	140.23	0.70917
	20.489	16.803	32.905	4.7992	0.34449	0.00064956	162.43	0.48976
	28.872	176.4	26.565	3.5994	0.1082	0.0013774	583.89	1.2494
	9.4587	28.195	24.444	1.7997	0.375	0	496.09	3.2402
	7.0815	19.247	81.254	4.1993	0.34387	0	30050	262.16
	7.7409	38.342	90	4.7992	0.71204	0	337.5	2.6936
	6.4185	12.429	59.036	1.7997	0.51852	0	217.19	2.0905
	7.1108	85.583	63.435	1.7997	0.37895	0	403.91	3.5092
	8.2993	29.052	45	2.9995	0.44853	0	176.37	1.3129
	9.0202	77.005	66.038	4.7992	0.64021	0	148.54	1.0173
	11.778	51.078	90	6.5989	0.76202	0	379.3	1.9895
	9.0914	66.952	7.125	4.1993	0.60611	0	187.5	1.2741
	51.871	93.443	67.834	7.7987	0.073316	0	1415.1	1.6855
	11.355	6.862	34.992	4.7992	0.094256	0.00090009	192.19	1.0457
	9.2868	4.8189	84.289	4.7992	0.64585	0	100.78	0.67044
	8.1432	36.415	90	0.5999	0.14737	0	2531.3	19.204
	5.8664	116.71	90	4.7992	0.1657	0	227.73	2.3983
	6.6339	46.387	23.962	1.1998	0.18182	0	812.5	7.5666
	8.0139	149.33	0	2.3996	0.027273	0	775	5.9746
	6.9581	106.19	80.538	2.9995	0.0049593	0	650	5.7712
	25.478	171.46	9.4623	1.7997	0.076451	0.00096824	575	1.3943
	22.86	47.16	26.565	1.1998	0.056522	0	2341.7	6.3285
	36.647	115.71	90	7.7987	0.13353	0.0016915	210.4	0.3547
	8.6219	11.314	60.945	9.5984	0.65435	0.0080515	27.832	0.19943
	8.063	170.71	56.31	2.3996	0.26282	0	325	2.4902
	8.1924	95.037	90	1.7997	0.28966	0	689.84	5.2022
	2.995	57.771	68.199	2.3996	0.43853	0	239.06	4.9313
	8.0042	130.79	55.008	0.5999	0.16832	0	2478.1	19.127
	6.1201	149.26	50.194	2.3996	0.22118	0	2475	24.984
	13.592	68.371	14.036	4.7992	0.23321	0	231.25	1.0511
	7.7014	0.62573	74.055	0.5999	0.16102	0.0025575	675	5.4148
	9.3283	96.961	23.962	1.7997	0.28022	0	873.44	5.7847
	7.268	36.183	32.005	2.3996	0.33511	0	305.47	2.5965
	6.0531	125.52	90	0.5999	0.10986	0	4450	45.418
	7.0307	112.89	63.435	0.5999	0.19149	0	2912.5	25.593
	68.788	176.86	54.409	2.3996	0.033898	0.0017972	3134.9	2.8156
	11.885	4.4242	84.472	2.3996	0.41341	0.00071073	500.78	2.6031
	9.1264	115.17	20.225	0.5999	0.14063	0	5109.4	34.587
	42.364	166.55	44.145	2.3996	0.02225	0.0010646	6916.7	10.087
	8.8868	122.16	90	2.9995	0.28514	0	441.41	3.0686
	6.7046	5.5248	14.036	5.3991	0.68268	0.007732	12.305	0.11338
	7.279	64.207	11.31	5.3991	0.44388	0	106.35	0.90261
	6.9454	47.143	33.69	5.3991	0.57477	0	66.992	0.5959
	9.5006	41.315	81.87	1.1998	0.076049	0.0030864	1643.8	10.689
	12.518	160.98	17.65	2.3996	0.2027	0	439.84	2.1708
	8.7206	18.249	4.0856	7.1988	0.32733	0.066781	159.57	1.1305
	7.208	68.237	5.1944	2.3996	0.62222	0	253.13	2.1695
	32.563	141.47	67.964	7.7987	0.18541	0.0016965	408.7	0.77541
	14.609	11.301	19.654	0.5999	0.10823	0	2565.6	10.85
	9.7704	4.4661	18.435	2.9995	0.5	0	75.391	0.47671
	5.6831	97.579	11.31	2.3996	0.34383	0	550	5.979
	5.9124	20.735	45	1.1998	0.18812	0	8650	90.386
	11.993	153.53	69.775	0.5999	0.060241	0.00079491	6846.9	35.272
	7.0105	136.34	4.3987	2.9995	0.32292	0.01318	740.23	6.5233
	7.7495	14.501	45	3.5994	0.29461	0.0064725	113.28	0.90309
	8.0318	27.07	23.199	1.1998	0.18978	0.0040404	1403.1	10.793
	8.0141	158.43	8.1301	0.5999	0.086207	0.018219	4093.8	31.558
	5.6071	75.956	14.036	2.9995	0.16717	0	143.75	1.5838
	8.2865	23.637	37.875	0.5999	0.079365	0.0057143	3531.3	26.327
	12.508	19.042	3.8141	2.3996	0.14474	0	365.43	1.805
	8.3331	56.955	0	4.1993	0.47523	0.0063025	136.52	1.0122
	25.122	7.1171	85.365	15.597	0.67906	0	114.55	0.2817
	53.073	24.416	23.199	22.196	0.55714	0.00067351	50.905	0.059257
	31.503	162.71	23.749	13.798	0.35744	0	30.13	0.059087
	38.555	48.749	40.03	22.796	0.76294	0	76.913	0.12324
	28.119	37.918	47.203	16.197	0.65782	0	64.378	0.14144
	34.209	59.529	45	16.797	0.70576	0	77.904	0.14069
	71.175	156.73	5.7106	17.397	0.14677	0.00039019	70.951	0.061585
	26.956	39.866	26.565	15.597	0.38201	0	90.803	0.20811
	19.547	25.543	41.424	5.3991	0.24584	0	186.23	0.58858
	63.075	170.45	4.2892	4.7992	0.068815	0.0010385	1521.9	1.4906
	29.539	83.429	45	5.999	0.17712	0	432.72	0.90501
	26.879	110.33	5.4403	7.7987	0.34929	0	255.32	0.58685
	30.042	80.284	36.87	1.7997	0.031626	0	3548.2	7.2967
	46.759	19.311	29.539	13.198	0.15309	0.00041507	327.15	0.43225
	26.534	17.56	68.199	9.5984	0.4701	0	125.04	0.29114
	34.445	90.289	28.951	8.9985	0.23574	0	241.73	0.43355
	13.074	110.72	72.897	5.3991	0.52757	0	603.81	2.8533
	17.401	97.628	8.9726	1.7997	0.075499	0	1981.7	7.0357
	14.692	2.6689	2.3859	0.5999	0.034221	0	2787.5	11.721
	50.59	174.34	71.94	6.5989	0.094255	0.0011945	90.552	0.11058
	33.736	61.39	90	11.998	0.17356	0.001031	598.06	1.0952
	11.731	149.04	30.466	1.1998	0.08078	0	3155.5	16.618
	28.322	37.745	77.619	6.5989	0.25844	0	460.11	1.0037
	32.354	17.715	20.556	8.3986	0.32225	0.0008843	96.817	0.18487
	21.906	88.471	60.945	1.7997	0.056034	0.00025316	2741.4	7.7315
	13.508	80.18	32.735	7.1988	0.34367	0	119.74	0.54763
	36.835	40.847	86.82	7.7987	0.1	0.00020813	1371.8	2.3008
	11.401	55.004	68.199	1.1998	0.10549	0	1504.7	8.1535
	6.2204	58.009	29.745	0.5999	0.1453	0.0025707	2737.5	27.188
	7.8306	35.447	68.199	0.5999	0.19192	0	2887.5	22.781
	37.07	49.686	87.797	4.1993	0.07035	0.0011629	3072.1	5.1199
	19.918	9.7332	22.932	1.1998	0.1	0	1798.4	5.5783
	25.243	30.921	74.476	2.9995	0.069559	0	6573.4	16.088
	39.88	60.886	45	22.196	0.69549	0	100.7	0.156
	20.415	43.456	6.009	11.998	0.73229	0	39.526	0.11962
	15.389	66.167	23.199	7.1988	0.51483	0	126.68	0.5086
	18.641	53.171	15.642	5.999	0.45803	0	140.63	0.46605
	46.668	39.645	16.336	16.797	0.33363	0	130.06	0.17218
	30.671	102.19	0	22.196	0.73422	0	54.273	0.10932
	15.439	54.608	42.274	7.7987	0.61578	0	128.53	0.51432
	21.052	35.688	83.66	6.5989	0.51099	0	519.73	1.5252
	40.116	65.231	48.468	12.598	0.48233	0	216.91	0.33404
	20.044	66.85	45	8.9985	0.67401	0	137.15	0.42272
	14.481	113.88	70.463	1.7997	0.083596	0	1970.3	8.4061
	44.413	44.526	13.241	21.596	0.55391	0.00016359	76.74	0.10675
	19.507	125.96	23.499	5.999	0.27724	0	249.78	0.79109
	42.4	87.236	33.69	3.5994	0.073774	9.0992e-05	1187.5	1.7303
	19.46	97.033	38.66	2.9995	0.15146	0	654.79	2.0788
	18.182	127.84	68.629	3.5994	0.21395	0	580.86	1.9737
	7.487	32.839	63.435	6.5989	0.35804	0	124.61	1.0282
	13.128	102.55	60.255	8.3986	0.57201	0	164.5	0.77412
	8.214	4.1345	36.87	5.3991	0.68993	0	3.6133	0.027176
	7.8664	46.892	9.4623	5.999	0.626	0	61.621	0.48395
	20.933	47.592	61.504	8.9985	0.29363	0	286.83	0.84651
	13.327	92.328	72.255	5.3991	0.45934	0	396.19	1.8366
	7.8866	105.39	29.745	1.1998	0.25217	0	1443.8	11.31
	15.111	109.35	75.069	0.5999	0.055556	0	7722.7	31.573
	7.7628	61.5	66.038	7.1988	0.4198	0	88.477	0.70414
	11.975	44.456	86.186	7.1988	0.30964	0	208.11	1.0737
	15.575	145.84	12.995	2.9995	0.1608	0	737.11	2.9239
	17.432	148.11	81.87	1.7997	0.064185	0	1868.8	6.6231
	14.502	14.224	19.654	7.7987	0.38437	0	50.781	0.21633
	17.994	113.83	16.699	10.798	0.49129	0	88.306	0.30318
	18.871	51.995	25.017	6.5989	0.49529	0	140.72	0.46071
	10.839	110.39	50.194	2.9995	0.33487	0	492.38	2.8064
	14.512	66.614	12.804	12.598	0.2244	0.0029806	117.52	0.50028
	11.027	153.97	75.964	1.1998	0.10309	0	1487.5	8.3338
	15.488	80.023	73.301	4.1993	0.2419	0	531.84	2.1215
	17.816	129.65	62.354	0.5999	0.04742	0	9643.8	33.442
	9.8098	19.823	23.962	7.1988	0.60414	0	38.232	0.24078
	16.38	126.44	5.7106	1.1998	0.093496	0	3268	12.326
	9.6482	73.821	61.189	4.7992	0.15038	0	255.47	1.6358
	7.3079	34.479	0	5.999	0.36188	0	42.188	0.35665
	15.032	63.638	32.471	1.7997	0.080519	0	1690.7	6.9488
	11.08	64.529	45	5.3991	0.20201	0	301.95	1.6836
	18.078	83.961	52.306	8.9985	0.55777	0	165.3	0.56489
	10.602	49.465	70.017	4.7992	0.13248	0	1039.8	6.0593
	13.052	137.01	0	1.1998	0.1608	0	1397.7	6.6159
	12.755	86.764	33.69	3.5994	0.26542	0	299.12	1.4488
	59.879	179.75	16.26	4.1993	0.046938	0.00046049	310.11	0.31995
	18.026	79.833	22.38	0.5999	0.035197	0	10194	34.937
	10.501	163	36.027	2.9995	0.11908	0	531.25	3.1255
	10.828	171.14	83.157	1.1998	0.032106	0	8250	47.071
	28.184	65.347	32.471	14.998	0.57963	0	112.74	0.24714
	19.806	10.396	18.435	10.198	0.37552	0	32.813	0.10235
	8.6206	34.054	78.69	7.1988	0.76587	0	103.13	0.73905
	7.4324	2.0644	5.7106	7.7987	0.28058	0	2.1973	0.018264
	65.918	143.23	90	14.398	0.1847	0	816.9	0.76562
	22.857	77.535	10.008	7.7987	0.64138	0.00062952	181.76	0.49128
	14.41	25.001	12.995	3.5994	0.21073	0	273.05	1.1706
	11.965	73.62	74.055	1.1998	0.032959	0	4209.4	21.735
	10.268	77.772	90	2.9995	0.43429	0	746.88	4.4936
	16.104	91.537	55.62	4.1993	0.20098	0	519.73	1.9938
	9.6845	126.37	54.782	4.7992	0.085238	0	140.63	0.89709
	13.9	41.637	79.509	1.7997	0.088372	0	5543.8	24.639
	25.969	70.21	11.31	4.7992	0.14417	0	624.08	1.4847
	7.4427	133.87	80.538	5.3991	0.47709	0	2806.3	23.294
	6.5759	7.9448	56.31	4.7992	0.12671	0	57.031	0.5358
	14.405	43.809	45	7.7987	0.63307	0	107.95	0.46295
	8.8695	15.367	21.038	4.7992	0.46927	0	37.305	0.25984
	8.747	70.441	41.987	2.3996	0.14171	0	706.25	4.9882
	6.2397	30.58	18.435	1.1998	0.20792	0	731.25	7.2401
	15.1	128.14	21.801	3.5994	0.34699	0	721.88	2.9534
	31.991	154.84	77.969	4.1993	0.063679	0	1061.1	2.0492
	10.387	66.946	67.62	2.3996	0.11283	0	828.91	4.9301
	16.928	81.506	46.469	1.7997	0.1502	0	1505.1	5.493
	16.85	5.9733	43.264	1.1998	0.048387	0	3393.8	12.443
	8.7178	105.69	65.225	0.5999	0.073446	0	4987.5	35.344
	8.4698	87.462	13.241	4.1993	0.1485	0	245.7	1.7922
	20.592	43.292	66.371	3.5994	0.14376	0	972.22	2.9169
	12.99	85.629	86.634	2.3996	0.12102	0	4248.4	20.206
	8.0947	10.562	30.964	1.1998	0.2377	0	389.06	2.9694
	46.295	90.364	4.3987	22.796	0.53843	0.00038815	138.22	0.18446
	54.571	25.625	84.193	22.196	0.46777	0	749.02	0.84796
	28.06	11.615	80.91	14.998	0.84595	0	60.66	0.13356
	37.768	34.143	10.954	19.197	0.44215	0	43.294	0.070819
	25.186	123.83	28.301	7.1988	0.1518	0	297.63	0.73007
	27.23	18.888	34.38	19.197	0.70245	0	19.211	0.043586
	26.468	97.284	47.386	14.998	0.60813	0	112.44	0.26246
	40.004	52.223	38.199	20.997	0.62601	0.00026601	109.16	0.16858
	20.699	59.283	25.017	13.798	0.51288	0	57.26	0.17091
	39.477	30.781	4.0856	20.997	0.42603	0	41.63	0.065149
	18.984	12.854	18.435	10.798	0.73406	0	18.875	0.061426
	32.018	72.892	57.995	9.5984	0.27588	0	281.83	0.54381
	17.718	81.607	50.906	2.3996	0.097938	0	980.86	3.4201
	30.116	77.809	43.315	14.398	0.69436	0	137.37	0.2818
	73.521	162.36	16.144	10.198	0.16729	0	208.5	0.17521
	21.333	164.63	8.9726	1.7997	0.053738	0	1791	5.1868
	30.501	17.502	76.608	14.998	0.4903	0	114.75	0.23243
	41.144	54.554	54.583	15.597	0.49365	0	150.52	0.22602
	30.042	78.809	33.69	7.7987	0.17784	0	298.88	0.61464
	18.608	43.648	82.405	2.3996	0.14068	0	1715.2	5.6946
	13.284	51.899	48.013	5.3991	0.32313	0	206.74	0.96145
	27.71	93.306	51.71	6.5989	0.20905	0	422.16	0.94121
	15.381	92.753	32.735	1.1998	0.096535	0	2134.8	8.5747
	60.854	22.28	81.327	8.3986	0.12752	0	1647.1	1.6721
	38.908	173.61	39.401	8.3986	0.12775	0.00094396	157.21	0.24963
	28.061	141.33	1.7899	0.5999	0.011421	0	10735	23.635
	29.575	13.238	81.469	4.1993	0.073859	0	1357.3	2.8353
	29.162	47.845	49.844	12.598	0.51781	0	127.83	0.27082
	21.157	125.9	35.707	0.5999	0.019931	0	6920.5	20.209
	17.814	112.65	11.31	1.7997	0.077764	0	2050.4	7.1107
	16.468	17.717	59.931	2.3996	0.14488	0	610.35	2.2897
	18.878	23.476	31.608	3.5994	0.097356	0	696.14	2.2782
	29.16	25.662	46.548	20.997	0.83553	0	33.851	0.071719
	53.409	47.193	88.586	18.597	0.39194	0	512.15	0.59241
	38.571	65.985	11.31	17.397	0.54796	0	102.23	0.16374
	52.15	34.311	88.977	19.197	0.47399	0	424.99	0.50347
	38.668	29.628	1.2189	22.796	0.46002	0	39.225	0.06267
	27.667	68.001	56.976	11.998	0.43407	0	184.15	0.41122
	24.263	66.695	87.614	7.1988	0.3245	0	535.62	1.3638
	33.968	120.84	9.6375	14.398	0.58625	0	105.29	0.1915
	31.891	71.851	30.141	7.7987	0.49434	0	166.02	0.32163
	28.223	50.877	3.1798	11.998	0.46337	0	99.463	0.21773
	21.956	55.313	69.228	8.9985	0.29851	0	198.72	0.55916
	21.971	47.353	37.875	15.597	0.52628	0	57.002	0.16028
	15.06	4.6138	62.103	3.5994	0.29792	0	85.742	0.35173
	20.878	1.3697	15.524	17.997	0.56267	0	1.6083	0.0047589
	15.964	67.217	35.538	8.3986	0.57794	0	99.475	0.38497
	27.039	38.355	60.642	13.798	0.62775	0	76.584	0.17498
	30.143	66.854	5.1944	11.398	0.34606	0	176.4	0.36156
	26.078	119.55	83.928	13.798	0.50921	0	203.55	0.48222
	14.12	64.27	86.987	2.9995	0.13767	0	870.02	3.8066
	13.89	134.37	71.565	1.1998	0.10841	0	3229.7	14.365
	14.285	81.169	25.56	7.1988	0.63445	0	118.92	0.5143
	21.613	64.992	21.801	8.9985	0.43913	0	96.179	0.27492
	14.171	21.213	3.1798	7.1988	0.60814	0	42.505	0.1853
	9.967	71.712	77.471	6.5989	0.50799	0	461.72	2.8619
	8.3691	37.776	4.0856	1.1998	0.16168	0	1221.9	9.0197
	37.363	95.819	48.576	10.198	0.34069	0	568.08	0.93932
	17.153	62.837	42.274	13.798	0.58785	0	75.647	0.27246
	64.198	154.8	1.5694	4.1993	0.10535	0.00022596	676.64	0.65115
	16.003	45.141	6.009	7.1988	0.18116	0	114.47	0.44189
	19.164	91.754	86.309	1.1998	0.044068	0	3003.3	9.6821
	17.791	21.729	45	5.3991	0.35503	0	140.45	0.48772
	17.325	94.143	9.8658	5.3991	0.17945	0.00040683	131.69	0.4696
	24.02	122.07	21.801	0.5999	0.013501	0	7294.5	18.762
	18.371	148.03	2.2026	5.999	0.12518	0.00044863	404.15	1.3591
	14.791	84.7	37.405	8.3986	0.32128	0	100.05	0.41789
	8.7055	67.884	40.601	0.5999	0.074074	0	3372.7	23.935
	18.497	16.612	17.65	2.3996	0.13811	0	694.34	2.3191
	18.756	8.9986	37.569	14.998	0.5981	0	11.652	0.038378
	46.626	74.612	90	8.9985	0.16235	0.00029808	1174.3	1.5559
	11.583	129.53	2.6026	2.9995	0.066395	0	989.84	5.2794
	10.045	115.34	66.038	1.7997	0.22624	0	2151.6	13.233
	17.403	86.305	75.964	6.5989	0.40765	0	222.89	0.79125
	24.076	8.4691	2.4366	11.398	0.36348	0	45.334	0.11633
	17.737	10.691	8.8807	1.1998	0.081081	0.0014098	1380.5	4.8084
	7.9171	76.414	45	0.5999	0.081081	0	2793	21.795
	9.2096	37.731	3.8141	0.5999	0.12291	0	2096.9	14.066
	11.941	1.7263	33.69	1.7997	0.12991	0	103.13	0.53356
	11.883	88.327	21.038	3.5994	0.18532	0	351.37	1.8268
	21.436	28.516	5.4403	9.5984	0.39723	0	112.81	0.32513
	15.755	60.114	3.8141	2.9995	0.13547	0	494.09	1.9374
	29.523	126.28	53.531	7.1988	0.15366	0	609.92	1.2763
	15.278	66.073	0	4.1993	0.37501	0	247.88	1.0023
	6.713	21.538	36.87	0.5999	0.19279	0	1356.3	12.482
	12.634	79.866	53.746	1.7997	0.13314	0	1093.2	5.3456
	15.916	75.416	32.619	6.5989	0.27637	0	194.9	0.75652
	35.605	144.33	64.026	1.7997	0.037553	0	4412.7	7.6568
	18.064	41.717	29.358	5.3991	0.28079	0	206.32	0.70564
	7.8119	29.004	22.62	4.7992	0.57964	0	54.492	0.43095
	19.937	77.158	25.56	0.5999	0.026087	0	6584.8	20.404
	8.9474	37.3	22.62	2.3996	0.22198	0	439.06	3.0316
	12.123	50.798	17.103	0.5999	0.068592	0	3241.4	16.519
	55.51	74.401	34.439	32.395	0.71713	0.00061157	110.03	0.12246
	45.802	1.7992	53.13	28.795	0.69777	0.0018667	6.7013	0.0090389
	39.034	87.411	7.125	10.798	0.19891	0.0037043	385.58	0.61026
	26.331	28.541	20.136	11.398	0.47154	0.0017197	40.373	0.094727
	51.426	24.623	9.0903	29.995	0.77624	0.0023344	23.648	0.028409
	51.343	81.766	77.905	25.796	0.57973	0.0027533	98.675	0.11873
	19.427	132.12	62.021	7.7987	0.42945	0.0061779	230.64	0.73347
	28.086	106.21	81.469	12.598	0.60911	0.0057786	113.43	0.2495
	26.258	71.835	5.7106	16.797	0.67513	0.0016965	92.29	0.21714
	36.474	120.61	11.689	4.1993	0.076285	0.0024297	1186.4	2.0095
	17.297	90.492	36.027	3.5994	0.24639	0	463.5	1.6555
	24.217	65.94	24.228	7.7987	0.13887	0	288.76	0.73666
	19.194	48.282	43.264	7.1988	0.39142	0	152.92	0.49222
	27.23	7.611	0	4.1993	0.13103	0.0057019	357.86	0.81193
	15.825	8.7786	12.995	5.3991	0.21415	0.015738	37.891	0.14793
	8.7611	12.13	69.444	2.9995	0.37192	0	266.41	1.8786
	31.347	80.063	46.332	17.397	0.73083	0.003219	97.464	0.19209
	31.704	101.47	45.83	12.598	0.28232	0.021354	259.03	0.50476
	9.5119	50.227	54.462	1.7997	0.18883	0.0030349	794.14	5.1579
	16.005	105.3	30.256	1.7997	0.13986	0.013532	1995.1	7.7014
	21.91	0.51892	37.235	16.797	0.35007	0	1.4618	0.0041218
	6.3507	15.863	70.017	1.7997	0.16601	0.044643	1543.8	15.018
	8.0556	73.223	90	4.7992	0.50385	0.01139	410.16	3.1456
	43.633	167.73	43.025	3.5994	0.024868	0.036059	5290.5	7.4908
	7.4724	83.326	30.964	1.7997	0.31532	0.018116	1303.9	10.78
	7.73	69.043	14.931	6.5989	0.47163	0.0042105	88.281	0.70557
	8.0938	110.86	39.806	8.3986	0.28783	0.0086059	830.86	6.3419
	24.059	158.04	13.134	3.5994	0.11121	0.0030434	1172.9	3.0119
	4.7895	116.26	12.529	3.5994	0.47342	0.014085	515.63	6.651
	9.383	94.191	63.435	0.5999	0.081761	0	3543.8	23.333
	10.658	65.297	8.7462	1.7997	0.19421	0	842.97	4.8865
	32.272	179.69	45	4.1993	0.068139	0.022174	101.56	0.19443
	19.714	89.38	8.7462	4.1993	0.27158	0.010621	721.84	2.2622
	47.924	136.42	44.397	2.9995	0.040048	0.027105	2862	3.6895
	46.678	105.02	23.703	7.7987	0.20405	0.014472	403.35	0.53384
	9.478	3.1106	61.699	1.7997	0.26891	0	193.75	1.2629
	12.338	80.242	13.241	4.7992	0.29003	0.014911	325.78	1.6313
	4.8887	19.173	56.31	0.5999	0.25	0.011765	2131.3	26.933
	7.5471	33.603	50.194	2.9995	0.082048	0.0085714	531.25	4.3488
	15.954	38.98	90	4.1993	0.30871	0	851.81	3.2985
	12.182	9.6507	2.6026	5.999	0.33333	0.0063391	35.498	0.18003
	46.907	84.564	38.157	18.597	0.50875	0.01474	163.06	0.21475
	24.409	85.34	34.695	9.5984	0.56616	0	165.58	0.41908
	37.597	77.069	43.727	14.998	0.52629	0	136.7	0.22462
	26.798	98.207	9.4623	11.398	0.56164	0	137.35	0.31665
	22.176	24.004	13.134	8.3986	0.47521	0	115.02	0.32044
	31.937	111.6	30.651	11.398	0.32448	0.0020523	230.66	0.44619
	12.656	112.72	48.576	4.7992	0.39595	0	85.254	0.41615
	32.876	102.38	37.235	15.597	0.64546	0	197.24	0.37064
	5.4806	18.158	21.801	5.3991	0.85127	0	10.352	0.11669
	20.541	91.78	84.289	5.3991	0.35345	0	632.03	1.9009
	33.371	154.81	26.565	8.3986	0.23338	0	267.08	0.49445
	22.673	46.381	87.955	8.9985	0.44044	0	654.61	1.7837
	13.716	143.56	6.3402	0.5999	0.037333	0	8356.3	37.638
	12.072	63.938	47.121	6.5989	0.52936	0	120.95	0.61895
	17.117	70.081	19.654	2.9995	0.092767	0	718.36	2.5928
	16.221	39.469	21.038	4.7992	0.4568	0	182.76	0.6961
	22.75	60.814	32.471	11.998	0.55704	0	108.38	0.29433
	27.267	22.536	11.689	19.197	0.51138	0	24.954	0.05654
	32.347	67.425	34.992	15.597	0.48321	0.0016972	109.62	0.20937
	16.985	13.282	3.9452	8.9985	0.65995	0	19.025	0.0692
	26.919	103.14	37.405	1.1998	0.04588	0.003602	3275.5	7.5174
	8.3091	56.315	0	4.7992	0.72168	0	109.28	0.8125
	17.873	142.55	55.784	2.9995	0.20643	0	779.79	2.6953
	13.371	138.88	57.095	11.398	0.28207	0.023244	145.53	0.67243
	33.462	141.5	54.462	7.7987	0.33229	0.0053837	270.03	0.49854
	24.881	18.434	90	11.998	0.59197	0	934.52	2.3205
	31.054	166.62	15.945	3.5994	0.080416	0.0071487	145.8	0.29006
	17.24	172.65	21.371	0.5999	0.033451	0	4962.5	17.783
	50.058	53.273	84.726	19.797	0.5754	0.00041273	344.88	0.42563
	22.2	80.063	43.264	0.5999	0.030826	0	5767.4	16.05
	68.926	17.255	75.774	6.5989	0.17316	0.0023617	1426.4	1.2785
	21.873	65.014	14.036	5.999	0.20158	0.0049718	298.85	0.84411
	7.6888	35.183	37.875	7.1988	0.32884	0	52.197	0.41941
	6.9268	28.549	90	1.7997	0.41304	0	779.69	6.954
	21.624	64.768	75.069	3.5994	0.13308	0	984.67	2.8132
	17.747	59.342	90	9.5984	0.73056	0	211.88	0.73758
	22.215	171.08	52.595	3.5994	0.095238	0.020468	674.22	1.875
	49.03	166.58	1.273	5.999	0.024104	0.095342	4034.7	5.0838
	10.486	64.59	39.289	7.1988	0.23614	0	104.44	0.61532
	12.178	65.456	5.7106	0.5999	0.079295	0	2796.9	14.189
	8.9893	59.693	75.256	7.7987	0.22325	0.0066225	183.79	1.2631
	19.343	71.433	5.7106	7.7987	0.19469	0.0084626	191.61	0.61198
	7.8329	7.5829	5.7106	5.3991	0.07072	0.016746	153.13	1.2077
	21.543	178.76	20.556	4.7992	0.25261	0	275	0.78864
	9.0644	0.57894	66.038	2.9995	0.37895	0	21.094	0.14377
	5.7875	0.87032	36.87	6.5989	0.019296	0	25	0.26687
	5.7398	81.742	33.69	0.5999	0.23944	0	1759.4	18.937
	2.396	81.633	53.13	2.9995	0.73736	0	117.19	3.0216
	38.401	166.84	30.964	2.3996	0.051489	0.02377	1950.5	3.138
	5.6023	106.49	23.199	1.1998	0.31818	0	1043.8	11.51
	20.846	114.41	24.444	4.7992	0.32834	0	405.1	1.2006
	24.67	63.385	57.265	8.3986	0.50351	0	314.35	0.78721
	9.0331	91.539	81.87	2.3996	0.40246	0	415.63	2.8426
	14.467	106.49	32.005	5.999	0.52052	0	132.23	0.56464
	17.397	24.82	82.405	2.3996	0.045993	0.031866	5119.5	18.181
	7.7406	12.853	8.1301	1.7997	0.016408	0	2375	18.956
	9.3623	67.615	54.462	2.3996	0.38168	0	565.23	3.7299
	19.489	121.32	77.196	2.9995	0.18304	0	813.28	2.578
	18.734	127.95	70.907	5.999	0.38767	0.0037283	316.39	1.0434
	12.101	133.16	61.699	3.5994	0.13256	0	514.84	2.6285
	7.8037	112.05	55.008	4.1993	0.34049	0	223.05	1.7658
	7.6643	86.285	63.435	5.3991	0.41549	0	90.918	0.73287
	8.4259	9.2486	42.274	2.9995	0.38932	0	65.625	0.48117
	7.8662	113.73	75.964	5.3991	0.55238	0	183.98	1.445
	7.3354	171.64	85.236	2.3996	0.18817	0	693.75	5.8429
	5.1236	50.163	56.31	3.5994	0.37925	0	219.53	2.6471
	9.1141	35.57	20.556	1.1998	0.19841	0	810.94	5.4969
	27.061	47.523	10.491	1.7997	0.10169	0	1338.5	3.0557
	12.681	77.54	75.964	6.5989	0.31754	0.011454	315.67	1.5379
	23.509	118.96	90	2.9995	0.13861	0.057875	2380	6.2545
	8.0544	20.918	8.1301	1.7997	0.36084	0	340.63	2.6127
	8.2376	41.842	0	1.1998	0.26136	0	1090.6	8.1794
	44.449	63.563	88.394	16.797	0.40057	0.0021785	400.51	0.55667
	41.926	28.07	3.6914	26.996	0.7944	0.0053313	23.441	0.034541
	58.283	95.686	90	23.396	0.66293	0.0062532	213.68	0.2265
	20.732	34.222	72.646	2.9995	0.2	0.0024038	1124.5	3.351
	72.089	53.705	16.477	16.797	0.27739	0.016084	150.91	0.12933
	22.554	0.39004	11.31	10.198	0.77815	0.0036889	0.8728	0.0023908
	15.965	35.625	31.608	11.998	0.61308	0.0048815	44.135	0.17079
	42.51	119.34	12.095	14.998	0.43634	0.0021978	227.85	0.33114
	12.691	61.167	38.66	2.3996	0.22468	0	580.37	2.8252
	13.152	103.36	81.87	3.5994	0.2551	0	454	2.1327
	13.13	129.72	54.162	1.7997	0.1903	0.0039432	1099.2	5.1722
	48.469	72.845	61.314	19.197	0.5572	0.0049532	105.68	0.1347
	65.09	156.07	29.055	8.3986	0.064574	0.07629	1774.9	1.6846
	36.81	5.0971	7.9072	19.197	0.60469	0.0062488	14.772	0.024793
	16.91	122.44	41.186	0.5999	0.052192	0.019765	8198.4	29.952
	26.051	77.834	88.898	7.1988	0.3947	0	355.17	0.84228
	6.3947	111.09	14.036	4.1993	0.73539	0	259.38	2.5059
	10.473	66.509	34.695	7.1988	0.74476	0.017778	171.83	1.0136
	17.789	7.5566	0	16.797	0.4345	0	11.737	0.040762
	10.248	178	26.565	2.3996	0.21909	0	71.875	0.4333
	14.156	130.91	8.5308	2.9995	0.14883	0.002914	765.53	3.341
	15.998	73.521	66.038	7.7987	0.50096	0.0050068	455.22	1.7579
	15.988	128.41	45	0.5999	0.040816	0.0024765	6598	25.496
	13.733	25.724	39.094	9.5984	0.46998	0.00057372	60.87	0.27384
	26.011	61.704	5.5275	13.798	0.51359	0.006773	65.839	0.15638
	16.991	99.423	71.565	4.7992	0.28159	0.0038483	333.45	1.2124
	19.753	24.446	7.125	4.1993	0.065732	0.006669	752.93	2.3549
	19.567	63.887	30.379	8.3986	0.5071	0	130.24	0.4112
	8.7875	52.655	26.565	0.5999	0.096774	0.016949	3943.8	27.726
	29.355	164.2	10.305	1.7997	0.040359	0.061314	3527.9	7.4249
	20.535	66.621	87.274	2.3996	0.13889	0.032755	1686.2	5.0731
	7.8767	12.059	33.69	7.1988	0.31608	0	33.105	0.25966
	11.977	52.527	86.82	7.1988	0.54706	0.0039063	232.45	1.199
	8.844	107.07	14.036	1.1998	0.27273	0	1962.5	13.709
	14.028	85.491	8.1301	5.3991	0.1301	0.011852	544.63	2.3985
	20.12	105.18	1.7899	4.1993	0.32026	0	352.49	1.0823
	10.008	62.3	55.008	0.5999	0.074468	0.0033557	4540.6	28.03
	18.728	86.188	79.695	8.3986	0.39085	0	265.33	0.87526
	5.9298	8.6262	53.13	2.3996	0.54258	0	109.38	1.1395
	7.2292	115.86	26.565	0.5999	0.16038	0	1512.5	12.926
	8.665	93.48	71.565	1.1998	0.21805	0.013889	2289.8	16.326
	17.226	78.907	40.764	7.1988	0.33347	0	150.44	0.53955
	4.792	80.147	8.1301	2.9995	0.51787	0	229.69	2.9612
	28.71	118.65	29.358	1.1998	0.064953	0.016053	3425.2	7.3706
	10.887	71.845	59.744	0.5999	0.065502	0.010896	3892.2	22.087
	9.2913	123.48	77.905	1.1998	0.091837	0.018653	2747.7	18.27
	8.8063	111.36	69.444	2.3996	0.33939	0.0061224	623.05	4.3709
	59.053	79.229	16.477	24.596	0.56195	0.029712	180.24	0.18856
	59.426	46.038	34.287	21.596	0.60285	0.0094998	108.33	0.11262
	48.193	69.917	30.964	17.997	0.56111	0.045236	213.35	0.2735
	28.333	77.005	2.7927	11.998	0.393	0.027235	197.09	0.42977
	24.435	63.847	41.009	16.797	0.72251	0.0071006	67.028	0.16947
	52.317	100.07	13.707	17.397	0.51467	0.023404	267.53	0.31592
	12.296	68.304	65.556	9.5984	0.59966	0.051661	200	1.0049
	6.4192	9.4127	78.69	4.7992	0.72287	0.031915	139.06	1.3384
	37.419	66.528	39.094	13.798	0.77178	0.0015085	105.84	0.17475
	14.115	10.684	65.556	5.999	0.33498	0.065948	262.7	1.1498
	7.9864	29.921	19.654	7.7987	0.61006	0.019737	45.557	0.35241
	12.381	76.274	28.072	1.1998	0.13988	0.046531	3330.5	16.619
	20.095	91.732	87.274	2.3996	0.10644	0.049735	2308	7.0956
	9.9093	11.867	21.801	4.1993	0.48148	0.0040706	80.078	0.49925
	6.0436	32.728	24.444	3.5994	0.35134	0.046832	374.22	3.8254
	5.427	5.7761	45	3.5994	0.27207	0.083333	284.38	3.2373
	8.8549	47.605	59.036	3.5994	0.53428	0.012681	281.05	1.9609
	17.426	82.101	64.44	7.7987	0.18595	0.051977	705.96	2.5028
	57.371	177.82	81.469	8.3986	0.1567	0.078189	725.71	0.78148
	35.415	179.16	89.045	3.5994	0.069994	0.10984	3248.4	5.6667
	15.287	104.78	82.875	5.999	0.40489	0.021765	339.23	1.3709
	8.0928	18.594	81.254	2.3996	0.23171	0.21481	5050	38.552
	6.3174	92.875	23.962	2.9995	0.65837	0.075988	1340.2	13.107
	9.0538	20.439	33.69	2.9995	0.079431	0.020833	293.75	2.0045
	8.1981	93.404	61.39	4.7992	0.57639	0.055762	625.29	4.7121
	6.8344	16.67	37.875	4.7992	0.23667	0.002994	64.844	0.58616
	9.2927	59.934	52.125	3.5994	0.091099	0.073529	3054.7	20.308
	10.952	158.17	35.538	3.5994	0.48768	0.020979	27.344	0.15424
	6.5008	75.944	0	5.3991	0.49754	0.058642	441.8	4.1986
	18.497	104.5	38.157	5.3991	0.3202	0.044172	449.56	1.5015
	11.087	14.412	29.476	2.3996	0.15891	0.13991	1359.4	7.5751
	25.043	78.442	30.651	7.1988	0.30982	0.047445	543.25	1.3402
	12.911	41.246	65.556	0.5999	0.060748	0.18852	30423	145.58
	18.829	120.34	37.304	2.9995	0.21524	0.12812	2566	8.4194
	8.1537	112.32	49.399	1.7997	0.27966	0.052369	2276.6	17.249
	11.485	91.486	30.964	3.5994	0.34987	0.066474	1000.3	5.3808
	16.293	131.61	43.452	2.9995	0.30467	0.16554	2766.6	10.49
	14.048	32.616	7.125	9.5984	0.40901	0.0052257	60.449	0.26584
	19.837	105.43	2.8624	10.198	0.38955	0.1192	386.98	1.2052
	7.6447	90.262	47.726	2.9995	0.49754	0.01085	380.47	3.0747
	7.1286	94.834	30.964	1.1998	0.14407	0.18519	9757.8	84.566
	6.7847	78.362	70.56	1.1998	0.14184	0.12857	9028.1	82.208
	16.692	138.85	74.578	5.3991	0.38676	0.036435	301.27	1.1151
	9.8832	87.645	15.524	3.5994	0.066635	0.051237	1228.1	7.677
	9.1704	74.045	56.31	2.3996	0.27612	0	555.86	3.7448
	4.5833	21.188	15.945	1.1998	0.041572	0.097222	28250	380.79
	5.6302	104.71	9.4623	1.7997	0.27059	0.21171	7918.8	86.892
	7.3162	54.618	84.806	1.7997	0.27642	0	748.44	6.32
	6.6861	27.926	36.027	1.1998	0.072319	0.030769	3662.5	33.842
	4.9663	11.127	66.801	4.7992	0.34347	0.07619	202.34	2.5171
	6.5398	102.47	50.194	4.1993	0.36276	0.19409	4431.3	41.861
	7.962	5.3219	6.3402	2.9995	0.29199	0.015748	55.859	0.43343
	7.4086	80.66	66.801	2.9995	0.60714	0.061453	940.63	7.8439
	7.9428	122.48	68.962	1.7997	0.18705	0.14286	8064.1	62.723
	6.6014	75.883	90	5.3991	0.66149	0.057432	846.09	7.9183
	7.3162	142.84	5.1944	0.5999	0.16514	0.16894	29275	247.21
	3.7951	33.655	63.435	3.5994	0.24382	0.14706	1721.9	28.03
	6.569	21.1	45	1.1998	0.19298	0.041667	10525	98.986
	21.227	124.9	74.055	7.7987	0.40896	0.016495	329.11	0.95785
	15.306	36.504	29.055	0.5999	0.053659	0.074858	11800	47.631
	9.3779	174.21	18.435	1.1998	0.090535	0.14429	17106	112.69
	11.415	158.1	19.44	2.9995	0.028795	0.16744	7591	41.083
	7.262	11.83	36.027	3.5994	0.21439	0.070352	467.19	3.9745
	7.6487	41.6	71.565	2.3996	0.25138	0.25214	30069	242.87
	5.5063	53.294	12.529	2.3996	0.085948	0.098837	2599.2	29.163
	22.184	24.384	13.392	0.5999	0.040503	0.14212	18736	52.179
	70.326	86.577	25.346	20.397	0.59995	0.011517	168.33	0.14788
	55.158	0.5926	49.899	22.196	0.63815	0.004624	3.0582	0.0034254
	45.975	36.312	86.186	20.397	0.63129	0.023836	319.72	0.42964
	53.806	20.238	85.795	13.198	0.3938	0.024643	656.46	0.75374
	23.313	67.441	57.529	14.398	0.80594	0.027144	220.36	0.58397
	26.518	88.658	14.381	10.198	0.47278	0.010759	181.4	0.42263
	35.943	46.15	75.174	6.5989	0.26859	0.011042	920.4	1.582
	36.526	162.95	0	8.3986	0.3394	0.0010991	31.613	0.05347
	14.614	69.995	47.726	12.598	0.98255	0.01343	101.27	0.42812
	33.064	48.079	22.249	10.798	0.38653	0.019764	186.56	0.34859
	17.863	108.97	38.047	8.3986	0.54393	0	135.64	0.46914
	19.487	61.042	20.556	5.3991	0.41255	0	228.3	0.72381
	30.995	78.853	33.69	12.598	0.63139	0.0081352	187.12	0.37297
	17.976	135.58	4.0856	2.3996	0.080263	0.0044357	919.92	3.1616
	19.268	85.283	19.29	1.1998	0.055833	0.0052836	2759.5	8.848
	18.725	64.99	47.49	4.1993	0.2769	0.0060976	447.74	1.4773
	58.834	47.541	11.094	12.598	0.18536	0.016579	349.09	0.36657
	23.886	1.7803	30.964	5.3991	0.19419	0.060833	82.764	0.21407
	8.0322	105.12	45	1.1998	0.12353	0	1518.8	11.681
	11.249	60.088	48.366	2.3996	0.11589	0.0060923	886.13	4.8666
	8.1716	113.3	3.8141	5.3991	0.17111	0.021138	390.04	2.9488
	15.651	39.498	86.634	0.5999	0.033632	0.055521	21159	83.523
	9.3055	122.94	19.654	7.1988	0.67404	0	1050	6.971
	13.1	30.293	10.62	5.3991	0.28315	0.0047529	102.34	0.48265
	18.002	61.212	12.529	9.5984	0.27141	0.042166	283.64	0.97337
	6.9321	14.056	35.538	1.1998	0.14679	0.042735	2025	18.047
	18.132	9.3566	27.897	0.5999	0.031008	0.0032922	4303.1	14.662
	53.12	156.22	18.667	1.7997	0.027427	0.10303	9327	10.848
	66.165	92.75	90	4.1993	0.065553	0.064024	2822.9	2.6358
	8.3305	178.7	34.992	0.5999	0.11765	0.028213	10750	79.723
	8.078	82.807	74.055	5.3991	0.5628	0.019531	1184.4	9.058
	14.337	52.627	84.289	3.5994	0.51321	0.017164	2896.9	12.483
	13.291	131.86	25.56	3.5994	0.27483	0.028571	698.54	3.247
	11.068	151.3	35.538	0.5999	0.053254	0.10769	12034	67.177
	11.031	42.275	3.1798	0.5999	0.048711	0.088303	10121	56.684
	8.9859	31.868	4.0856	2.9995	0.23313	0.064957	690.04	4.7442
	7.7103	27.468	59.036	4.1993	0.078708	0	292.19	2.3412
	7.8615	31.965	0	1.1998	0.32174	0	504.69	3.9661
	5.6737	93.088	51.34	0.5999	0.16949	0	1671.9	18.205
	8.9667	99.937	10.305	1.7997	0.18987	0.030354	1407.4	9.697
	41.512	79.141	83.66	24.596	0.78995	0.0052843	285.4	0.42475
	28.705	61.261	60.255	13.198	0.63824	0	171.79	0.36974
	34.506	24.87	50.389	22.796	0.38191	0.0075703	62.63	0.11213
	54.939	98.704	26.565	15.597	0.52378	0.021994	242.65	0.27287
	36.04	79.485	59.534	19.197	0.69996	0.012075	117.3	0.20107
	50.124	37.154	57.724	24.596	0.58598	0.005013	86.998	0.10723
	55.356	53.048	2.6425	11.398	0.19998	0.0023271	382.48	0.42686
	13.619	86.475	38.047	2.9995	0.21911	0.039788	961.18	4.3603
	13.271	82.52	25.201	7.7987	0.72136	0	93.042	0.43313
	10.772	10.299	24.228	8.3986	0.50349	0.010341	20.898	0.11986
	11.566	44.004	50.711	5.3991	0.61443	0.051232	242.38	1.2947
	13.88	74.319	32.471	6.5989	0.61858	0	113.48	0.50507
	14.701	59.683	14.534	12.598	0.6266	0.0033487	72.546	0.30487
	12.73	98.277	82.405	10.198	0.69863	0.020833	828.27	4.0198
	15.262	56.368	49.185	5.999	0.5969	0.031885	333.37	1.3495
	8.5107	39.115	36.87	1.7997	0.27219	0	501.17	3.6381
	7.3979	22.013	81.87	5.3991	0.76733	0	760.94	6.3546
	9.4584	91.017	20.556	5.3991	0.60476	0	167.33	1.093
	9.9818	95.439	7.125	4.1993	0.56621	0.020962	311.33	1.9269
	16.706	93.383	35.538	4.1993	0.25323	0.081261	1194	4.4155
	14.249	53.525	38.66	10.798	0.41118	0.0020229	67.529	0.29278
	18.143	143.63	17.879	10.198	0.41298	0.043623	287.26	0.97814
	25.628	24.752	85.236	11.398	0.65551	0.019404	756.27	1.8231
	18.828	106.49	11.31	4.7992	0.35385	0.071508	966.85	3.1725
	18.611	70.369	57.995	4.7992	0.21159	0.019318	557.7	1.8513
	8.5313	74.153	90	4.7992	0.55172	0.029167	1102.3	7.9826
	9.4636	143.78	17.103	2.9995	0.38462	0.04417	777.34	5.0746
	17.033	104.92	7.7652	1.7997	0.15232	0.082889	3149.1	11.422
	6.4789	13.115	23.199	5.999	0.55278	0.023729	49.023	0.46746
	12.11	54.904	71.565	7.1988	0.58235	0.018373	329.13	1.679
	8.9206	78.31	23.199	2.3996	0.45714	0.070686	1415.8	9.8053
	7.0498	76.562	32.005	2.9995	0.31096	0.044218	948.44	8.3115
	13.405	90.418	47.291	0.5999	0.047478	0.016627	4792.6	22.088
	8.756	3.6203	23.199	8.9985	0.31963	0	5.3711	0.037897
	19.903	156.1	25.56	4.1993	0.1073	0.13477	1312.5	4.0741
	11.653	83.476	22.38	1.7997	0.38519	0.050613	1628.5	8.6341
	8.5227	130.37	4.7636	5.999	0.54841	0.021922	375.39	2.7212
	7.3082	47.207	12.529	3.5994	0.62193	0	138.67	1.1723
	12.085	86.031	17.103	2.9995	0.2434	0.080397	1253	6.4057
	8.7317	135.68	90	2.3996	0.16993	0.086356	4242.2	30.015
	31.005	136.08	57.529	2.9995	0.10631	0.079363	2414.4	4.8109
	18.099	54.189	85.914	2.3996	0.20264	0	1067.3	3.6432
	19.904	93.21	32.471	1.7997	0.10487	0.045264	3240.6	10.058
	7.8768	27.776	24.444	1.7997	0.47619	0.01004	431.25	3.3824
	6.4151	90.701	48.814	4.7992	0.53838	0	559.38	5.387
	8.6689	100.13	75.964	1.7997	0.19012	0.13894	11854	84.478
	34.474	103.77	0	1.7997	0.10611	0.014247	2257	4.0448
	14.913	132.83	90	1.7997	0.058571	0.14072	21580	89.4
	12.007	26.844	86.82	8.9985	0.58059	0.0075472	876.56	4.51
	7.2592	102.32	33.69	2.9995	0.58828	0.065445	1227.7	10.449
	12.125	42.257	85.764	2.9995	0.37959	0.016351	735.16	3.7457
	6.1041	67.273	7.125	5.999	0.033263	0.021661	6462.5	65.407
	9.7413	60.116	21.801	2.3996	0.42073	0.042276	886.33	5.6212
	8.9775	122.92	65.225	0.5999	0.080247	0.15942	14394	99.052
	8.5226	105.63	36.87	1.1998	0.089965	0.084142	18175	131.75
	13.342	155.62	30.466	2.3996	0.15686	0.039267	1146.9	5.3105
	14.705	77.918	25.201	4.1993	0.27805	0.0091394	386.52	1.6239
	7.5006	57.659	45	1.7997	0.37931	0.012563	711.72	5.8622
	27.511	109.98	64.885	9.5984	0.063835	0.085466	730.54	1.6405
	10.26	25.246	81.254	4.1993	0.39771	0	951.56	5.7296
	13.264	100.15	75.256	4.1993	0.43243	0	322.95	1.5042
	6.0683	93.044	0	1.7997	0.40196	0.011696	819.53	8.3435
	7.2764	143.42	63.435	5.3991	0.024422	0.038339	1432.8	12.165
	9.4917	56.31	56.31	8.3986	0.49492	0	253.52	1.6501
	2.396	99.772	21.801	1.1998	0.30066	0	375	9.6692
	7.8178	129.88	75.964	4.1993	0.55077	0.022965	482.03	3.8092
	9.3992	136.48	83.29	1.7997	0.26797	0.0060976	1089.8	7.1634
	10.418	68.357	60.255	1.1998	0.09434	0.12555	12047	71.442
	9.7953	86.713	74.476	1.1998	0.059856	0.08322	13125	82.781
	7.0568	63.409	39.806	8.9985	0.1139	0.026726	248.63	2.1767
	6.1943	83.521	60.945	5.3991	0.57974	0	90.234	0.89997
	7.236	42.772	74.055	3.5994	0.0059428	0.087156	4454.7	38.034
	2.6788	58.194	90	1.7997	0.46841	0	575	13.261
	6.0996	158.63	59.036	0.5999	8.1567e-17	0.09894	68350	692.28
	6.6338	40.297	61.928	1.7997	0.37647	0.041551	975	9.0801
	10.951	58.445	26.565	1.1998	0.012893	0.090361	11753	66.307
	6.3634	107.91	18.435	2.9995	0.42609	0.012698	520.31	5.0515
	14.677	164.96	39.401	1.1998	0.0020042	0.21153	119830	504.37
	30.179	6.6824	4.3987	4.1993	0.087842	0.021437	387.5	0.79325
	8.053	133.11	63.435	1.1998	0.13609	0.037671	13934	106.9
	5.2079	42.306	26.565	4.1993	0.52918	0.096386	601.56	7.1362
	19.143	17.576	90	1.1998	0.053996	0.0098569	4206.3	13.575
	9.5554	71.251	53.973	1.1998	0.1564	0.0093168	1662.5	10.749
	7.6817	51.202	4.7636	2.3996	0.24605	0.020672	1028.9	8.275
	12.619	6.1888	41.186	3.5994	0.22857	0	160.94	0.78789
	10.265	73.805	49.764	0.5999	0.097938	0.0068871	3132	18.85
	53.253	29.451	35.838	35.994	0.8289	0.020221	37.063	0.042998
	50.637	4.1284	55.33	25.796	0.60789	0.0084593	32.945	0.040194
	40.141	154.92	58.173	14.398	0.17896	0.052357	365.26	0.56217
	26.639	113.3	36.87	14.398	0.61559	0.0076336	56.793	0.13171
	71.074	151.73	8.1301	12.598	0.099906	0.030552	660.93	0.5745
	33.852	113.92	25.278	5.3991	0.1193	0.0060025	687.4	1.2545
	27.335	91.807	42.709	9.5984	0.45889	0.0045643	201.43	0.45525
	60.059	105.74	75.5	17.997	0.45769	0.033384	439.45	0.45204
	43.636	11.841	15.68	4.1993	0.074054	0.0044496	1065.9	1.5092
	10.798	76.645	14.036	6.5989	0.52744	0.006867	161.28	0.92276
	15.149	66.632	50.194	0.5999	0.042959	0.0069313	5063.7	20.65
	8.1579	14.227	69.444	1.7997	0.30612	0	612.5	4.6385
	18.426	82.294	14.931	6.5989	0.4648	0.00051706	186.65	0.62579
	30.734	94.494	45	11.998	0.37851	0.0033352	301.5	0.60604
	16.435	80.845	74.932	7.1988	0.49451	0.012791	124.61	0.46841
	18.655	119.58	60.945	4.7992	0.31223	0.03138	707.74	2.3438
	11.568	9.105	50.194	0.5999	0.072874	0	2331.3	12.45
	25.088	58.284	18.435	4.7992	0.16933	0.0042176	458.68	1.1295
	8.9174	68.931	51.34	4.7992	0.49143	0	165.72	1.1481
	10.3	19.942	77.005	1.1998	0.19271	0.0015432	1637.5	9.8217
	60.161	174.43	13.772	0.5999	0.0038481	0.061589	42621	43.768
	30.763	104.83	32.471	5.3991	0.16377	0	829.3	1.6655
	19.839	129.23	30.964	6.5989	0.40029	0	248.05	0.77242
	4.0053	53.677	74.055	0.5999	0.30769	0	1325	20.438
	8.3627	120.39	64.983	0.5999	0.093023	0.094527	16016	118.32
	65.58	65.629	29.836	20.397	0.70438	0.0037473	135.57	0.12772
	53.038	7.7496	79.287	28.795	0.70156	0	53.972	0.062868
	35.069	1.2548	63.104	11.398	0.47235	0.002263	20.242	0.03566
	63.627	60.45	81.469	21.596	0.49663	0.0202	944.68	0.91726
	64.701	69.148	77.957	15.597	0.39921	0.019355	335.13	0.32
	5.7495	49.665	48.814	2.9995	0.41998	0	314.06	3.3747
	55.327	147.57	76.293	13.798	0.23543	0.040135	134.1	0.14974
	11.618	54.618	79.695	3.5994	0.24233	0	1266	6.732
	33.549	57.049	74.476	10.798	0.77581	0.0037569	196.37	0.36161
	27.653	27.578	1.5482	3.5994	0.14106	0.01855	1013.4	2.2641
	24.183	118.55	18.925	4.1993	0.14208	0.0081201	463.82	1.1849
	6.5881	42.555	45	4.7992	0.29648	0	130.66	1.2253
	17.935	117.93	5.9061	4.1993	0.30303	0	424.99	1.4639
	18.885	134.4	39.289	2.9995	0.11203	0.010885	1757.5	5.7493
	16.698	72.498	57.995	5.3991	0.32332	0.027055	334.13	1.2363
	58.199	162.23	27.719	7.1988	0.080618	0.087747	1889.3	2.0056
	5.1778	23.017	50.194	1.1998	0.32353	0	534.38	6.376
	13.786	77.101	33.69	1.1998	0.070905	0	1622.5	7.271
	6.9689	7.4699	59.744	4.1993	0.907	0	30.078	0.26665
	31.414	174.57	12.265	0.5999	0.0119	0.042302	19173	37.705
	8.2002	18.273	45	4.7992	0.70833	0	53.32	0.40171
	10.349	28.381	22.62	1.1998	0.10182	0.020188	1764.8	10.536
	7.8814	89.379	12.995	3.5994	0.4717	0	161.13	1.2631
	5.3506	9.8074	14.036	1.7997	0.47126	0	162.5	1.8763
	4.193	46.639	4.3987	4.1993	0.76071	0	72.461	1.0676
	6.7006	91.379	14.036	4.7992	0.79131	0	173.05	1.5955
	29.146	90.435	90	9.5984	0.52242	0.020119	121.29	0.25709
	33.206	79.361	19.093	10.798	0.49383	0.013352	202.24	0.37626
	8.8615	25.555	35.538	5.999	0.58571	0	49.658	0.3462
	44.839	105.55	14.036	7.1988	0.21818	0.018666	454.29	0.62593
	23.341	100.82	56.634	4.7992	0.28016	0.0054159	428.69	1.1346
	30.083	89.035	2.5448	11.998	0.6244	0	122.25	0.25105
	42.151	2.4238	5.0796	9.5984	0.62323	0.0029595	11.182	0.016389
	25.616	93.41	38.66	8.3986	0.40483	0.023644	241.51	0.58246
	17.33	10.114	55.008	11.998	0.72743	0	27.502	0.098042
	8.2581	60.897	60.945	4.1993	0.32064	0	221.48	1.657
	20.983	69.587	85.236	10.198	0.93319	0.0018223	265.11	0.78058
	18.939	82.321	11.889	7.1988	0.55807	0	148.55	0.48457
	8.3165	36.407	33.69	4.7992	0.94035	0	53.467	0.39718
	7.325	104.24	90	2.9995	0.31922	0	417.97	3.5252
	9.3937	79.029	60.945	1.1998	0.21899	0	1107.4	7.2832
	15.284	43.905	14.826	1.1998	0.045627	0.0033686	1403.1	5.6715
	17.203	121.26	34.592	5.3991	0.43714	0.020113	502.39	1.8042
	3.812	6.3176	54.462	2.9995	0.76733	0	14.063	0.22791
	15.88	39.834	47.203	13.798	0.7268	0	36.035	0.14019
	18.123	102.61	65.376	0.5999	0.024324	0.047819	10909	37.188
	8.2813	70.508	50.194	1.1998	0.275	0	953.91	7.1163
	13.54	90.054	45	1.1998	0.058511	0	1256.6	5.7339
	19.364	19.766	75.964	1.7997	0.071111	0.021696	4520.7	14.423
	13.662	151.41	49.538	1.1998	0.055085	0.035963	3068	13.873
	9.8537	33.654	17.103	1.7997	0.23649	0.088962	2176.6	13.646
	11.717	108.21	18.435	0.5999	0.04878	0.041353	9050.8	47.721
	12.433	78.195	90	2.3996	0.22407	0	972.85	4.8341
	16.917	87.602	13.496	1.1998	0.044619	0.022953	3193.9	11.664
	7.8995	63.768	70.017	1.7997	0.25735	0	576.56	4.5092
	11.595	133.68	15.255	5.3991	0.41601	0	326.76	1.7411
	26.961	110.58	14.323	10.798	0.57548	0.0093497	233.56	0.53518
	11.306	37.245	65.556	4.1993	0.5642	0	179.69	0.98184
	11.541	99.142	14.036	2.9995	0.36704	0.00625	493.16	2.64
	18.029	105.54	77.471	0.5999	0.11714	0.0045045	3163.3	10.84
	19.029	50.947	9.4623	11.398	0.40905	0	89.905	0.29189
	19.097	45.791	11.889	10.798	0.80772	0	57.01	0.18443
	24.381	116.13	59.3	10.198	0.667	0.009561	182.03	0.46125
	8.7603	70.814	20.556	2.3996	0.55825	0	358.59	2.5289
	22.542	112.23	18.435	11.398	0.74004	0	110.16	0.30191
	11.621	95.426	0	1.7997	0.25543	0.012755	1131.3	6.0139
	9.6471	63.191	40.601	1.7997	0.2249	0.0065104	890.63	5.7036
	17.366	123.04	38.928	2.3996	0.21045	0.04182	1260.9	4.4857
	10.309	84.348	75.964	5.999	0.5372	0.0031746	142.48	0.85383
	14.786	53.646	8.5308	10.198	0.63299	0	37.781	0.15785
	9.9065	157.47	2.6026	2.3996	0.16941	0.012821	585.94	3.6541
	28.124	96.252	81.254	5.3991	0.26336	0.040205	595.46	1.308
	12.615	132.17	20.854	1.1998	0.068293	0.014493	2290.6	11.218
	10.389	107.02	53.13	3.5994	0.43973	0.0015504	319.92	1.9025
	7.5271	89.457	18.435	2.3996	0.40105	0	391.41	3.2125
	13.92	146.59	0	1.1998	0.13882	0.0042787	1807.8	8.0234
	8.2253	57.808	90	2.3996	0.064248	0	1142.2	8.5789
	8.1168	94.928	19.983	0.5999	0.14729	0.016575	4265.6	32.467
	7.1816	158.58	0	1.1998	0.1785	0.023495	1240.6	10.673
	15.384	160.26	14.931	4.1993	0.14211	0.014683	209.38	0.84081
	7.8203	149.89	77.905	6.5989	0.3302	0	174.22	1.3763
	53.172	171.53	15.945	9.5984	0.077459	0.010003	741.61	0.86166
	16.343	115.26	15.945	4.7992	0.35597	0.001039	250.29	0.94618
	22.366	85.908	23.703	14.398	0.69848	0	80.167	0.22144
	10.643	79.963	51.34	9.5984	0.51147	0	42.676	0.24771
	16.411	8.8369	51.34	10.198	0.17348	0	44.141	0.16617
	8.689	73.659	0	6.5989	0.69949	0	56.641	0.40272
	10.387	83.533	71.565	5.999	0.50081	0.0063052	230.76	1.3726
	7.5761	60.758	18.435	4.7992	0.00064064	0	1775	14.474
	8.9542	101.96	22.62	5.999	0.39624	0.015474	244.14	1.6845
	14.756	110.27	13.392	5.999	0.057178	0.00060496	452.93	1.8964
	8.5465	126.45	7.125	0.5999	-2.8853e-17	0.023095	51125	369.56
	20.484	165.34	65.323	5.999	0.14497	0.042717	318.16	0.95956
	14.841	103.76	17.65	0.5999	0.074786	0.011827	5413.3	22.534
	14.276	128.69	2.6026	1.1998	0.080508	0.011927	5877.7	25.436
	7.5518	18.839	63.435	0.5999	0.038815	0	6087.5	49.801
	6.3834	12.288	26.565	2.9995	0.091077	0	251.56	2.4347
	20.385	12.82	30.579	4.7992	0.54799	0.0067883	88.672	0.26873
	9.4724	165.27	0	2.9995	0.033083	0	1387.5	9.0494
	6.9289	150.23	0	1.7997	0.10491	0.0033389	2381.3	21.232
	6.4944	1.1843	32.005	0.5999	0.32813	0	225	2.1404
	6.0241	86.622	45	1.1998	0.32759	0	2350	24.1
	13.104	11.831	11.31	1.7997	0.092664	0.040795	3665.6	17.282
	7.6315	147.31	0	2.9995	0.05217	0	703.13	5.6921
	7.7794	109.35	14.036	4.1993	0.1466	0	344.53	2.7361
	9.3048	96.145	29.358	1.1998	0.35172	0.0017953	853.13	5.6644
	9.0422	87.548	90	6.5989	0.69908	0.0013699	290.23	1.983
	12.548	31.993	3.0128	7.7987	0.14313	0	112.21	0.55245
	11.65	23.747	63.435	1.1998	0.030577	0.0019666	5725	30.361
	10.242	21.767	6.7098	7.7987	0.66695	0	11.426	0.068921
	13.634	122.59	73.301	6.5989	0.37251	0.014661	503.59	2.2819
	16.19	104.22	53.13	4.7992	0.48471	0.0073337	487.79	1.8614
	9.8469	9.8977	32.005	1.7997	0.27603	0	217.19	1.3626
	14.199	89.452	0	2.3996	0.31985	0.0030511	533.2	2.3199
	18.177	122.78	29.055	1.1998	0.0072578	0.002419	11047	37.545
	9.9049	82.559	71.565	5.999	0.33476	0	188.77	1.1774
	13.911	133.72	19.44	8.9985	0.59315	0	674.41	2.9951
	20.371	147.91	64.799	0.5999	0.017403	0.00027956	9103.1	27.607
	19.484	174.52	5.0425	4.7992	0.033442	0.0079655	713.28	2.2616
	13.128	174.39	49.399	0.5999	0.065143	0	4125	19.413
	28.748	127.03	0	2.3996	0.049565	0.0082385	2930	6.2967
	46.138	118.22	79.114	10.198	0.27618	0.0083278	479.01	0.6414
	26.553	2.881	80.91	7.1988	0.38462	0.0052814	194.14	0.4517
	8.5652	159.36	3.8141	0.5999	0.11538	0.040254	12925	93.227
	28.511	161.79	36.384	5.999	0.18132	0.00021146	158.69	0.34386
	9.1337	20.768	26.565	3.5994	0.3998	0	119.34	0.80718
	7.5537	89.17	71.565	6.5989	0.52875	0	91.309	0.74679
	18.976	73.116	29.745	6.5989	0.51545	0.0045455	181.3	0.59025
	9.0105	122.06	63.435	1.7997	0.35043	0.056604	2559.4	17.548
	13.103	103.77	38.66	5.999	0.26094	0	197.85	0.93285
	52.95	85.499	55.491	20.997	0.40259	0.026645	133.26	0.15548
	52.455	163.13	55.008	14.998	0.19021	0.10683	422.75	0.4979
	16.089	72.808	37.569	8.3986	0.73947	0	115.63	0.44399
	28.42	68.586	57.095	13.798	0.60197	0.032527	159.86	0.3475
	9.2797	68.185	14.036	10.798	0.49366	0.11033	208.2	1.3861
	29.678	8.3606	2.8624	16.197	0.6448	0.02155	15.903	0.033104
	41.263	3.7345	90	6.5989	0.25198	0.052236	908.94	1.3609
	12.906	130.44	34.695	2.3996	0.071125	0.15171	19955	95.52
	61.409	133.84	8.2072	11.398	0.2023	0.079098	502.94	0.50597
	58.28	26.351	11.129	14.998	0.33537	0.0048145	159.25	0.16882
	17.024	81.994	36.469	2.3996	0.14431	0.039614	1903.5	6.9077
	27.197	154.56	41.424	8.3986	0.19905	0.02267	416.98	0.94721
	30.119	45.162	90	7.1988	0.43063	0.025339	497.04	1.0195
	8.5412	78.202	11.31	7.7987	0.066598	0.023857	338.38	2.4475
	51.717	97.415	24.842	19.197	0.42971	0.020989	192.58	0.23005
	20.268	98.353	39.094	2.9995	0.13932	0.10668	3694.5	11.261
	16.259	37.935	29.745	2.9995	0.20114	0.11154	1462.2	5.5557
	28.45	114.98	45	9.5984	0.39398	0.026638	288.4	0.62627
	20.006	61.726	90	3.5994	0.14591	0.038627	2042.4	6.3069
	5.189	86.099	9.4623	2.9995	0.023724	0.047431	10025	119.36
	4.852	15.336	8.1301	4.7992	0.13138	0.052326	506.25	6.4461
	21.73	136.65	10.204	11.398	0.38969	0.14577	315.97	0.8983
	8.8945	56.815	38.157	10.198	0.59525	0.035714	77.832	0.54061
	12.92	47.017	14.931	2.3996	0.12556	0.072165	1945.7	9.3038
	50.636	160.27	11.997	0.5999	0.0057774	0.16185	134310	163.86
	37.508	140.59	5.5275	2.9995	0.05528	0.13965	3920.3	6.4573
	10.574	79.978	14.931	8.9985	0.45263	0.11273	481.45	2.8128
	38.657	165.09	30.069	5.999	0.04329	0.12764	17024	27.208
	21.063	74.409	55.305	4.1993	0.26126	0.15158	2403.2	7.049
	7.4202	77.449	19.983	2.3996	0.37719	0.035897	922.27	7.6787
	9.1618	111.46	21.038	8.9985	0.00035216	0.076923	30350	204.66
	56.62	104.79	80.181	4.1993	0.046306	0.077561	5614.5	6.1261
	28.54	151.91	84.094	0.5999	0.016746	0.033554	18237	39.477
	21.693	97.572	52.125	4.7992	0.33377	0.12459	1467.7	4.1799
	13.417	83.429	80.538	5.3991	9.916e-17	0.30333	83259	383.38
	5.9806	101.2	56.31	3.5994	0.45649	0.064286	882.03	9.1114
	16.155	87.792	39.094	2.9995	0.25364	0.05207	1239.4	4.7395
	17.448	24.463	5.0425	0.5999	0.048583	0.012982	9178.1	32.498
	20.818	48.407	60.255	4.1993	0.18413	0.040103	1075	3.1901
	5.6928	11.423	0	1.7997	0.0020073	0.056872	9850	106.89
